# Supplementary material for: 3D Printed Multimaterial Microfluidic Valve
Source: PubMed Central journal article supplement (PMC4985141; doi:10.1371/journal.pone.0160624), 2016-08-15
Supplement: pone.0160624.s004.pdf [file pone.0160624.s004.pdf]

**S1 Table. Data Processing for Flow Rates for Membrane Thickness.**

| Membrane Thickness                | Average Applied Control Pressure, Absolute Pressure (psi) | Flow Rate ( $\mu\text{L}/\text{second}$ ) | Change in Flow Pressure, Trendline Slope (psi per data point) | Pressure Change Trendline Fit ( $R^2$ value) | Applied Control Pressure Standard Deviation (psi) |
|-----------------------------------|-----------------------------------------------------------|-------------------------------------------|---------------------------------------------------------------|----------------------------------------------|---------------------------------------------------|
| 200 $\mu\text{m}$ Sample 1, Run 1 | 14.51                                                     | 43.31                                     | -2.458E-04                                                    | 0.9996                                       | 0.06                                              |
|                                   | 19.84                                                     | 30.87                                     | -1.752E-04                                                    | 0.9990                                       | 0.18                                              |
|                                   | 24.72                                                     | 1.93                                      | -1.093E-05                                                    | 0.8881                                       | 0.13                                              |
|                                   | 29.66                                                     | 0.95                                      | -5.380E-06                                                    | 0.5731                                       | 0.16                                              |
|                                   | 14.37                                                     | 38.34                                     | -2.176E-04                                                    | 0.9991                                       | 0.06                                              |
| 200 $\mu\text{m}$ Sample 1, Run 2 | 14.49                                                     | 42.17                                     | -2.393E-04                                                    | 0.9993                                       | 0.06                                              |
|                                   | 19.76                                                     | 31.93                                     | -1.812E-04                                                    | 0.9988                                       | 0.19                                              |
|                                   | 24.76                                                     | 1.65                                      | -9.367E-06                                                    | 0.8337                                       | 0.06                                              |
|                                   | 29.79                                                     | 1.39                                      | -7.906E-06                                                    | 0.5911                                       | 0.05                                              |
|                                   | 14.88                                                     | 42.98                                     | -2.439E-04                                                    | 0.9993                                       | 0.05                                              |
| 200 $\mu\text{m}$ Sample 2, Run 1 | 14.37                                                     | 49.23                                     | -2.794E-04                                                    | 0.9988                                       | 0.06                                              |
|                                   | 19.56                                                     | 49.53                                     | -2.811E-04                                                    | 0.9991                                       | 0.05                                              |
|                                   | 24.71                                                     | 43.27                                     | -2.456E-04                                                    | 0.9989                                       | 0.05                                              |
|                                   | 29.69                                                     | 15.13                                     | -8.587E-05                                                    | 0.9952                                       | 0.05                                              |
|                                   | 34.54                                                     | 1.38                                      | -7.836E-06                                                    | 0.8575                                       | 0.05                                              |
| 200 $\mu\text{m}$ Sample 2, Run 2 | 14.38                                                     | 47.19                                     | -2.678E-04                                                    | 0.9993                                       | 0.06                                              |
|                                   | 14.38                                                     | 49.18                                     | -2.791E-04                                                    | 0.9980                                       | 0.06                                              |
|                                   | 19.60                                                     | 46.88                                     | -2.661E-04                                                    | 0.9995                                       | 0.06                                              |
|                                   | 24.47                                                     | 45.77                                     | -2.598E-04                                                    | 0.9987                                       | 0.05                                              |
|                                   | 29.57                                                     | 22.01                                     | -1.250E-04                                                    | 0.9961                                       | 0.04                                              |
| 300 $\mu\text{m}$ Sample 1, Run 1 | 34.52                                                     | 0.87                                      | -4.911E-06                                                    | 0.4560                                       | 0.03                                              |
|                                   | 14.36                                                     | 41.34                                     | -2.347E-04                                                    | 0.9942                                       | 0.05                                              |
|                                   | 19.71                                                     | 45.50                                     | -2.582E-04                                                    | 0.9987                                       | 0.18                                              |
|                                   | 24.66                                                     | 48.31                                     | -2.742E-04                                                    | 0.9955                                       | 0.05                                              |
|                                   | 29.73                                                     | 43.17                                     | -2.450E-04                                                    | 0.9980                                       | 0.06                                              |
|                                   | 34.60                                                     | 39.69                                     | -2.253E-04                                                    | 0.9966                                       | 0.05                                              |
|                                   | 39.80                                                     | 3.16                                      | -1.794E-05                                                    | 0.7771                                       | 0.04                                              |
|                                   | 44.42                                                     | 2.37                                      | -1.346E-05                                                    | 0.6539                                       | 0.05                                              |
| 300 $\mu\text{m}$ Sample 1, Run 2 | 14.37                                                     | 43.22                                     | -2.453E-04                                                    | 0.9931                                       | 0.01                                              |
|                                   | 19.67                                                     | 45.91                                     | -2.606E-04                                                    | 0.9987                                       | 0.18                                              |
|                                   | 24.66                                                     | 44.97                                     | -2.553E-04                                                    | 0.9986                                       | 0.06                                              |
|                                   | 29.75                                                     | 42.09                                     | -2.389E-04                                                    | 0.9989                                       | 0.05                                              |
|                                   | 34.59                                                     | 36.18                                     | -2.054E-04                                                    | 0.9982                                       | 0.05                                              |
|                                   | 39.69                                                     | 11.10                                     | -6.301E-05                                                    | 0.9939                                       | 0.04                                              |
|                                   | 44.66                                                     | 1.26                                      | -7.139E-06                                                    | 0.5153                                       | 0.04                                              |

|                                         |       |       |            |        |      |
|-----------------------------------------|-------|-------|------------|--------|------|
| 300 $\mu\text{m}$<br>Sample 2,<br>Run 1 | 14.37 | 41.67 | -2.365E-04 | 0.9979 | 0.06 |
|                                         | 14.33 | 45.20 | -2.566E-04 | 0.9978 | 0.06 |
|                                         | 19.69 | 51.96 | -2.949E-04 | 0.9963 | 0.06 |
|                                         | 24.63 | 45.70 | -2.594E-04 | 0.9977 | 0.05 |
|                                         | 34.48 | 42.52 | -2.413E-04 | 0.9976 | 0.05 |
|                                         | 39.60 | 29.82 | -1.693E-04 | 0.9975 | 0.03 |
|                                         | 44.58 | 3.49  | -1.981E-05 | 0.9094 | 0.04 |
| 300 $\mu\text{m}$<br>Sample 2,<br>Run 2 | 14.32 | 40.31 | -2.288E-04 | 0.9996 | 0.05 |
|                                         | 14.32 | 45.84 | -2.602E-04 | 0.9988 | 0.06 |
|                                         | 19.55 | 47.47 | -2.694E-04 | 0.9969 | 0.05 |
|                                         | 24.52 | 47.27 | -2.683E-04 | 0.9971 | 0.05 |
|                                         | 29.62 | 44.03 | -2.499E-04 | 0.9983 | 0.05 |
|                                         | 34.64 | 40.19 | -2.281E-04 | 0.9978 | 0.03 |
|                                         | 39.52 | 24.00 | -1.362E-04 | 0.9977 | 0.05 |
| 400 $\mu\text{m}$<br>Sample 1,<br>Run 1 | 44.51 | 0.94  | -5.309E-06 | 0.6425 | 0.05 |
|                                         | 14.32 | 41.90 | -2.378E-04 | 0.9993 | 0.05 |
|                                         | 14.36 | 44.34 | -2.517E-04 | 0.9989 | 0.06 |
|                                         | 24.58 | 43.04 | -2.443E-04 | 0.9909 | 0.05 |
|                                         | 34.67 | 45.06 | -2.557E-04 | 0.9974 | 0.05 |
|                                         | 44.69 | 37.14 | -2.108E-04 | 0.9991 | 0.04 |
|                                         | 49.72 | 15.51 | -8.803E-05 | 0.9913 | 0.04 |
| 400 $\mu\text{m}$<br>Sample 1,<br>Run 2 | 54.62 | 1.59  | -9.040E-06 | 0.6907 | 0.05 |
|                                         | 14.37 | 40.71 | -2.311E-04 | 0.9978 | 0.06 |
|                                         | 14.36 | 43.79 | -2.486E-04 | 0.9996 | 0.06 |
|                                         | 24.64 | 46.43 | -2.635E-04 | 0.9978 | 0.06 |
|                                         | 34.61 | 43.65 | -2.477E-04 | 0.9993 | 0.05 |
|                                         | 44.67 | 36.90 | -2.094E-04 | 0.9983 | 0.03 |
|                                         | 49.71 | 1.77  | -1.002E-05 | 0.8208 | 0.05 |
| 400 $\mu\text{m}$<br>Sample 2,<br>Run 1 | 54.56 | 0.79  | -4.469E-06 | 0.4076 | 0.05 |
|                                         | 14.36 | 40.99 | -2.327E-04 | 0.9989 | 0.05 |
|                                         | 14.36 | 47.42 | -2.691E-04 | 0.9990 | 0.06 |
|                                         | 19.72 | 46.08 | -2.616E-04 | 0.9988 | 0.06 |
|                                         | 24.61 | 48.74 | -2.766E-04 | 0.9955 | 0.04 |
|                                         | 29.66 | 46.24 | -2.624E-04 | 0.9977 | 0.04 |
|                                         | 34.58 | 44.21 | -2.510E-04 | 0.9968 | 0.05 |
| 400 $\mu\text{m}$<br>Sample 2,<br>Run 2 | 39.52 | 40.61 | -2.305E-04 | 0.9978 | 0.06 |
|                                         | 44.58 | 30.83 | -1.750E-04 | 0.9963 | 0.04 |
|                                         | 49.68 | 0.58  | -3.279E-06 | 0.2463 | 0.05 |
|                                         | 14.36 | 45.15 | -2.563E-04 | 0.9977 | 0.05 |
|                                         | 14.35 | 45.59 | -2.587E-04 | 0.9981 | 0.05 |
|                                         | 19.66 | 48.42 | -2.748E-04 | 0.9980 | 0.05 |
|                                         | 24.69 | 46.49 | -2.639E-04 | 0.9981 | 0.05 |
|                                         | 29.58 | 45.08 | -2.559E-04 | 0.9979 | 0.05 |

|                                   |       |       |            |        |      |
|-----------------------------------|-------|-------|------------|--------|------|
| 500 $\mu$ m<br>Sample 1,<br>Run 1 | 34.61 | 44.60 | -2.531E-04 | 0.9977 | 0.05 |
|                                   | 39.61 | 39.74 | -2.256E-04 | 0.9981 | 0.05 |
|                                   | 44.58 | 26.51 | -1.505E-04 | 0.9986 | 0.04 |
|                                   | 49.67 | 0.64  | -3.637E-06 | 0.2716 | 0.05 |
|                                   | 14.36 | 42.58 | -2.417E-04 | 0.9975 | 0.06 |
|                                   | 14.37 | 44.26 | -2.512E-04 | 0.9957 | 0.06 |
|                                   | 19.78 | 45.42 | -2.578E-04 | 0.9969 | 0.06 |
|                                   | 24.60 | 42.92 | -2.436E-04 | 0.9988 | 0.06 |
|                                   | 29.70 | 42.64 | -2.420E-04 | 0.9980 | 0.32 |
|                                   | 34.64 | 43.03 | -2.442E-04 | 0.9970 | 0.04 |
|                                   | 39.70 | 40.76 | -2.314E-04 | 0.9983 | 0.04 |
|                                   | 44.45 | 35.51 | -2.016E-04 | 0.9962 | 0.04 |
|                                   | 49.74 | 31.39 | -1.782E-04 | 0.9927 | 0.02 |
|                                   | 54.63 | 0.77  | -4.358E-06 | 0.2640 | 0.05 |
|                                   | 59.61 | 1.19  | -6.753E-06 | 0.4116 | 0.05 |
| 500 $\mu$ m<br>Sample 1,<br>Run 2 | 14.37 | 39.71 | -2.254E-04 | 0.9925 | 0.07 |
|                                   | 14.36 | 43.92 | -2.493E-04 | 0.9985 | 0.05 |
|                                   | 24.39 | 41.10 | -2.333E-04 | 0.9990 | 0.05 |
|                                   | 34.65 | 39.07 | -2.218E-04 | 0.9992 | 0.04 |
|                                   | 44.69 | 35.38 | -2.008E-04 | 0.9995 | 0.04 |
|                                   | 49.58 | 13.57 | -7.703E-05 | 0.9979 | 0.05 |
|                                   | 54.58 | 0.83  | -4.715E-06 | 0.2517 | 0.03 |
|                                   | 59.58 | 0.54  | -3.063E-06 | 0.1744 | 0.05 |
| 500 $\mu$ m<br>Sample 2,<br>Run 1 | 14.37 | 39.67 | -2.252E-04 | 0.9978 | 0.05 |
|                                   | 14.36 | 48.05 | -2.727E-04 | 0.9983 | 0.05 |
|                                   | 24.54 | 45.79 | -2.599E-04 | 0.9987 | 0.06 |
|                                   | 34.51 | 44.76 | -2.540E-04 | 0.9994 | 0.14 |
|                                   | 44.68 | 42.25 | -2.398E-04 | 0.9990 | 0.04 |
|                                   | 49.79 | 40.07 | -2.274E-04 | 0.9997 | 0.08 |
|                                   | 54.50 | 37.25 | -2.114E-04 | 0.9965 | 0.05 |
|                                   | 59.36 | 0.70  | -3.978E-06 | 0.6148 | 0.05 |
| 500 $\mu$ m<br>Sample 2,<br>Run 2 | 14.38 | 46.84 | -2.658E-04 | 0.9990 | 0.06 |
|                                   | 19.44 | 47.68 | -2.706E-04 | 0.9988 | 0.05 |
|                                   | 24.61 | 45.13 | -2.562E-04 | 0.9990 | 0.07 |
|                                   | 29.70 | 45.19 | -2.565E-04 | 0.9952 | 0.05 |
|                                   | 34.49 | 44.13 | -2.505E-04 | 0.9988 | 0.05 |
|                                   | 39.70 | 43.54 | -2.471E-04 | 0.9988 | 0.08 |
|                                   | 44.45 | 41.15 | -2.336E-04 | 0.9992 | 0.02 |
|                                   | 49.68 | 38.53 | -2.187E-04 | 0.9985 | 0.05 |
|                                   | 54.38 | 8.82  | -5.007E-05 | 0.9962 | 0.03 |
|                                   | 59.18 | 0.73  | -4.167E-06 | 0.4694 | 0.09 |
|                                   | 14.38 | 42.64 | -2.420E-04 | 0.9992 | 0.06 |
