# Supplementary material for: 3D Printed Multimaterial Microfluidic Valve
Source: PubMed Central journal article supplement (PMC4985141; doi:10.1371/journal.pone.0160624), 2016-08-15
Supplement: pone.0160624.s005.pdf [file pone.0160624.s005.pdf]

**S2 Table. Data Processing for Flow Rates for Channel Width**

| Channel Width                     | Applied Control Pressure, Absolute Pressure (psi) | Flow Rate ( $\mu\text{L}/\text{second}$ ) | Change in Flow Pressure, Trendline Slope (psi per data point) | Pressure Change Trendline Fit ( $R^2$ value) | Applied Control Pressure Standard Deviation (psi) |
|-----------------------------------|---------------------------------------------------|-------------------------------------------|---------------------------------------------------------------|----------------------------------------------|---------------------------------------------------|
| 700 $\mu\text{m}$ Sample 1, Run 1 | 14.34                                             | 44.67                                     | -2.536E-04                                                    | 0.9990                                       | 0.05                                              |
|                                   | 24.41                                             | 45.61                                     | -2.589E-04                                                    | 0.9993                                       | 0.13                                              |
|                                   | 34.48                                             | 43.19                                     | -2.451E-04                                                    | 0.9994                                       | 0.05                                              |
|                                   | 44.23                                             | 26.30                                     | -1.493E-04                                                    | 0.9949                                       | 0.03                                              |
|                                   | 49.62                                             | 0.75                                      | -4.281E-06                                                    | 0.4517                                       | 0.03                                              |
| 700 $\mu\text{m}$ Sample 1, Run 2 | 14.34                                             | 42.37                                     | -2.405E-04                                                    | 0.9995                                       | 0.07                                              |
|                                   | 14.34                                             | 45.92                                     | -2.607E-04                                                    | 0.9985                                       | 0.05                                              |
|                                   | 19.55                                             | 48.56                                     | -2.756E-04                                                    | 0.9976                                       | 0.06                                              |
|                                   | 24.47                                             | 47.93                                     | -2.721E-04                                                    | 0.9968                                       | 0.18                                              |
|                                   | 29.58                                             | 44.92                                     | -2.550E-04                                                    | 0.9983                                       | 0.05                                              |
|                                   | 34.51                                             | 42.59                                     | -2.417E-04                                                    | 0.9990                                       | 0.04                                              |
|                                   | 39.51                                             | 39.23                                     | -2.227E-04                                                    | 0.9986                                       | 0.05                                              |
|                                   | 44.41                                             | 27.12                                     | -1.540E-04                                                    | 0.9962                                       | 0.06                                              |
| 700 $\mu\text{m}$ Sample 2, Run 1 | 49.53                                             | 0.48                                      | -2.697E-06                                                    | 0.5002                                       | 0.04                                              |
|                                   | 14.34                                             | 40.23                                     | -2.283E-04                                                    | 0.9995                                       | 0.05                                              |
|                                   | 14.38                                             | 50.05                                     | -2.841E-04                                                    | 0.9983                                       | 0.06                                              |
|                                   | 19.47                                             | 48.43                                     | -2.749E-04                                                    | 0.9989                                       | 0.13                                              |
|                                   | 24.71                                             | 47.56                                     | -2.699E-04                                                    | 0.9992                                       | 0.04                                              |
|                                   | 29.69                                             | 46.33                                     | -2.630E-04                                                    | 0.9985                                       | 0.05                                              |
|                                   | 34.56                                             | 38.88                                     | -2.207E-04                                                    | 0.9995                                       | 0.07                                              |
|                                   | 39.67                                             | 0.82                                      | -4.667E-06                                                    | 0.3652                                       | 0.05                                              |
| 700 $\mu\text{m}$ Sample 2, Run 2 | 44.28                                             | 0.67                                      | -3.810E-06                                                    | 0.1048                                       | 0.06                                              |
|                                   | 14.38                                             | 43.60                                     | -2.475E-04                                                    | 0.9996                                       | 0.06                                              |
|                                   | 14.38                                             | 49.16                                     | -2.790E-04                                                    | 0.9994                                       | 0.05                                              |
|                                   | 19.49                                             | 47.14                                     | -2.675E-04                                                    | 0.9996                                       | 0.22                                              |
|                                   | 24.66                                             | 46.52                                     | -2.641E-04                                                    | 0.9976                                       | 0.05                                              |
|                                   | 29.68                                             | 45.49                                     | -2.582E-04                                                    | 0.9990                                       | 0.04                                              |
|                                   | 34.89                                             | 35.21                                     | -1.999E-04                                                    | 0.9995                                       | 0.06                                              |
|                                   | 39.62                                             | 0.56                                      | -3.174E-06                                                    | 0.2190                                       | 0.05                                              |
| 900 $\mu\text{m}$ Sample 1, Run 1 | 44.72                                             | 1.07                                      | -6.102E-06                                                    | 0.2415                                       | 0.05                                              |
|                                   | 14.39                                             | 44.90                                     | -2.549E-04                                                    | 0.9995                                       | 0.06                                              |
|                                   | 14.32                                             | 46.13                                     | -2.618E-04                                                    | 0.9982                                       | 0.05                                              |
|                                   | 19.65                                             | 50.46                                     | -2.864E-04                                                    | 0.9980                                       | 0.05                                              |
|                                   | 24.48                                             | 46.20                                     | -2.622E-04                                                    | 0.9985                                       | 0.04                                              |
|                                   | 34.54                                             | 33.14                                     | -1.881E-04                                                    | 0.9988                                       | 0.04                                              |
|                                   | 39.56                                             | 0.93                                      | -5.275E-06                                                    | 0.4690                                       | 0.05                                              |

|                                    |       |       |            |        |      |
|------------------------------------|-------|-------|------------|--------|------|
| 900 $\mu$ m<br>Sample<br>1, Run 2  | 14.33 | 42.95 | -2.438E-04 | 0.9989 | 0.06 |
|                                    | 14.37 | 49.01 | -2.782E-04 | 0.9949 | 0.08 |
|                                    | 19.58 | 46.61 | -2.645E-04 | 0.9985 | 0.06 |
|                                    | 24.44 | 46.63 | -2.647E-04 | 0.9987 | 0.06 |
|                                    | 29.59 | 46.06 | -2.614E-04 | 0.9978 | 0.05 |
|                                    | 34.45 | 22.94 | -1.302E-04 | 0.9979 | 0.05 |
|                                    | 39.58 | 0.90  | -5.136E-06 | 0.4744 | 0.04 |
| 900 $\mu$ m<br>Sample<br>2, Run 1  | 14.32 | 42.85 | -2.432E-04 | 0.9992 | 0.05 |
|                                    | 14.36 | 47.25 | -2.682E-04 | 0.9986 | 0.06 |
|                                    | 19.62 | 46.86 | -2.660E-04 | 0.9991 | 0.05 |
|                                    | 24.29 | 46.48 | -2.638E-04 | 0.9988 | 0.05 |
|                                    | 29.58 | 42.49 | -2.412E-04 | 0.9989 | 0.05 |
|                                    | 34.55 | 36.75 | -2.086E-04 | 0.9988 | 0.05 |
|                                    | 39.59 | 7.96  | -4.518E-05 | 0.9956 | 0.02 |
| 900 $\mu$ m<br>Sample<br>2, Run 2  | 44.59 | 1.17  | -6.642E-06 | 0.4807 | 0.05 |
|                                    | 14.36 | 42.20 | -2.395E-04 | 0.9995 | 0.06 |
|                                    | 14.37 | 45.83 | -2.601E-04 | 0.9997 | 0.05 |
|                                    | 19.63 | 45.03 | -2.556E-04 | 0.9990 | 0.05 |
|                                    | 24.52 | 45.28 | -2.570E-04 | 0.9984 | 0.05 |
|                                    | 29.58 | 40.43 | -2.295E-04 | 0.9989 | 0.04 |
|                                    | 34.31 | 29.25 | -1.660E-04 | 0.9952 | 0.04 |
| 1100 $\mu$ m<br>Sample<br>1, Run 1 | 39.62 | 1.09  | -6.194E-06 | 0.5730 | 0.05 |
|                                    | 44.57 | 0.15  | -8.443E-07 | 0.0079 | 0.03 |
|                                    | 14.36 | 41.66 | -2.365E-04 | 0.9989 | 0.05 |
|                                    | 14.33 | 48.37 | -2.745E-04 | 0.9969 | 0.06 |
|                                    | 24.51 | 48.42 | -2.748E-04 | 0.9968 | 0.05 |
|                                    | 29.68 | 48.11 | -2.731E-04 | 0.9963 | 0.03 |
|                                    | 34.63 | 28.38 | -1.611E-04 | 0.9986 | 0.03 |
| 1100 $\mu$ m<br>Sample<br>1, Run 2 | 39.67 | 0.73  | -4.146E-06 | 0.2764 | 0.05 |
|                                    | 14.32 | 42.14 | -2.392E-04 | 0.9994 | 0.06 |
|                                    | 14.31 | 46.12 | -2.618E-04 | 0.9997 | 0.05 |
|                                    | 19.67 | 47.00 | -2.668E-04 | 0.9969 | 0.06 |
|                                    | 24.58 | 47.50 | -2.696E-04 | 0.9961 | 0.05 |
|                                    | 29.65 | 43.37 | -2.462E-04 | 0.9974 | 0.05 |
|                                    | 34.57 | 28.27 | -1.605E-04 | 0.9795 | 0.05 |
| 1100 $\mu$ m<br>Sample<br>2, Run 1 | 39.58 | 0.58  | -3.313E-06 | 0.3794 | 0.03 |
|                                    | 14.32 | 41.62 | -2.362E-04 | 0.9997 | 0.06 |
|                                    | 14.38 | 49.95 | -2.835E-04 | 0.9987 | 0.06 |
|                                    | 19.72 | 52.33 | -2.970E-04 | 0.9986 | 0.05 |
|                                    | 24.71 | 49.47 | -2.808E-04 | 0.9989 | 0.04 |
|                                    | 29.69 | 46.87 | -2.660E-04 | 0.9988 | 0.04 |
|                                    | 34.49 | 27.21 | -1.545E-04 | 0.9979 | 0.05 |
|                                    | 39.72 | 0.53  | -2.995E-06 | 0.2857 | 0.04 |

|          |       |       |            |        |      |
|----------|-------|-------|------------|--------|------|
|          | 14.37 | 42.33 | -2.402E-04 | 0.9997 | 0.06 |
| 1100 µm  | 14.38 | 50.77 | -2.882E-04 | 0.9996 | 0.06 |
| Sample   | 19.75 | 49.07 | -2.785E-04 | 0.9994 | 0.05 |
| 2, Run 2 | 24.60 | 47.24 | -2.681E-04 | 0.9995 | 0.04 |
|          | 29.56 | 43.69 | -2.480E-04 | 0.9988 | 0.12 |
|          | 34.50 | 22.44 | -1.274E-04 | 0.9967 | 0.05 |
|          | 39.71 | 0.52  | -2.929E-06 | 0.1880 | 0.04 |
|          | 14.38 | 44.92 | -2.549E-04 | 0.9989 | 0.06 |
| 1300 µm  | 14.35 | 43.98 | -2.496E-04 | 0.9969 | 0.06 |
| Sample   | 19.67 | 47.91 | -2.720E-04 | 0.9980 | 0.05 |
| 1, Run 1 | 24.50 | 45.29 | -2.571E-04 | 0.9980 | 0.04 |
|          | 29.56 | 28.69 | -1.629E-04 | 0.9979 | 0.04 |
|          | 34.50 | 1.08  | -6.111E-06 | 0.4479 | 0.05 |
|          | 39.70 | 3.93  | -2.231E-05 | 0.7247 | 0.04 |
|          | 14.34 | 43.60 | -2.475E-04 | 0.9989 | 0.05 |
| 1300 µm  | 14.34 | 47.99 | -2.724E-04 | 0.9979 | 0.05 |
| Sample   | 19.63 | 46.62 | -2.646E-04 | 0.9970 | 0.03 |
| 1, Run 2 | 24.37 | 44.80 | -2.543E-04 | 0.9991 | 0.04 |
|          | 29.60 | 29.71 | -1.686E-04 | 0.9964 | 0.05 |
|          | 34.47 | 0.99  | -5.642E-06 | 0.5994 | 0.06 |
|          | 39.59 | 0.43  | -2.436E-06 | 0.2592 | 0.03 |
|          | 14.33 | 42.69 | -2.423E-04 | 0.9975 | 0.05 |
| 1300 µm  | 14.36 | 46.88 | -2.661E-04 | 0.9995 | 0.05 |
| Sample   | 19.59 | 49.51 | -2.810E-04 | 0.9981 | 0.06 |
| 2, Run 1 | 24.42 | 46.19 | -2.622E-04 | 0.9984 | 0.06 |
|          | 29.51 | 43.29 | -2.457E-04 | 0.9992 | 0.06 |
|          | 34.61 | 14.14 | -8.027E-05 | 0.9922 | 0.04 |
|          | 39.60 | 1.39  | -7.877E-06 | 0.4600 | 0.03 |
|          | 14.36 | 42.38 | -2.406E-04 | 0.9992 | 0.06 |
| 1300 µm  | 14.36 | 42.94 | -2.438E-04 | 0.9992 | 0.06 |
| Sample   | 19.58 | 44.66 | -2.535E-04 | 0.9990 | 0.06 |
| 2, Run 2 | 24.50 | 42.21 | -2.396E-04 | 0.9982 | 0.04 |
|          | 29.52 | 39.27 | -2.229E-04 | 0.9988 | 0.05 |
|          | 34.48 | 14.32 | -8.131E-05 | 0.9827 | 0.05 |
|          | 39.56 | 0.43  | -2.444E-06 | 0.1881 | 0.05 |
|          | 14.36 | 40.82 | -2.317E-04 | 0.9979 | 0.06 |
