# Supplementary material for: 3D Printed Multimaterial Microfluidic Valve
Source: PubMed Central journal article supplement (PMC4985141; doi:10.1371/journal.pone.0160624), 2016-08-15
Supplement: pone.0160624.s006.pdf [file pone.0160624.s006.pdf]

**S3 Table. Data Processing for Flow Rates for Membrane Material**

| Membrane Shore Value                | Applied Control Pressure, Absolute Pressure (psi) | Flow Rate ( $\mu\text{l}/\text{second}$ ) | Change in Flow Pressure, Trendline Slope (psi per data point) | Pressure Change Trendline Fit ( $R^2$ value) | Applied Control Pressure Standard Deviation (psi) |
|-------------------------------------|---------------------------------------------------|-------------------------------------------|---------------------------------------------------------------|----------------------------------------------|---------------------------------------------------|
| Shore 26-28 Scale A Sample 1, Run 1 | 14.36                                             | 41.34                                     | -2.347E-04                                                    | 0.9942                                       | 0.05                                              |
|                                     | 19.71                                             | 45.50                                     | -2.582E-04                                                    | 0.9987                                       | 0.18                                              |
|                                     | 24.66                                             | 48.31                                     | -2.742E-04                                                    | 0.9955                                       | 0.05                                              |
|                                     | 29.73                                             | 43.17                                     | -2.450E-04                                                    | 0.9980                                       | 0.06                                              |
|                                     | 34.60                                             | 39.69                                     | -2.253E-04                                                    | 0.9966                                       | 0.05                                              |
|                                     | 39.80                                             | 3.16                                      | -1.794E-05                                                    | 0.7771                                       | 0.04                                              |
|                                     | 44.42                                             | 2.37                                      | -1.346E-05                                                    | 0.6539                                       | 0.05                                              |
| Shore 26-28 Scale A Sample 1, Run 2 | 14.37                                             | 43.22                                     | -2.453E-04                                                    | 0.9931                                       | 0.01                                              |
|                                     | 19.67                                             | 45.91                                     | -2.606E-04                                                    | 0.9987                                       | 0.18                                              |
|                                     | 24.66                                             | 44.97                                     | -2.553E-04                                                    | 0.9986                                       | 0.06                                              |
|                                     | 29.75                                             | 42.09                                     | -2.389E-04                                                    | 0.9989                                       | 0.05                                              |
|                                     | 34.59                                             | 36.18                                     | -2.054E-04                                                    | 0.9982                                       | 0.05                                              |
|                                     | 39.69                                             | 11.10                                     | -6.300E-05                                                    | 0.9939                                       | 0.04                                              |
|                                     | 44.66                                             | 1.26                                      | -7.140E-06                                                    | 0.5153                                       | 0.04                                              |
| Shore 26-28 Scale A Sample 2, Run 1 | 14.37                                             | 41.67                                     | -2.365E-04                                                    | 0.9979                                       | 0.06                                              |
|                                     | 14.33                                             | 45.20                                     | -2.566E-04                                                    | 0.9978                                       | 0.06                                              |
|                                     | 19.69                                             | 44.32                                     | -2.516E-04                                                    | 0.9989                                       | 0.06                                              |
|                                     | 24.63                                             | 42.71                                     | -2.424E-04                                                    | 0.9977                                       | 0.05                                              |
|                                     | 34.48                                             | 42.52                                     | -2.413E-04                                                    | 0.9976                                       | 0.05                                              |
|                                     | 39.60                                             | 29.82                                     | -1.693E-04                                                    | 0.9975                                       | 0.03                                              |
|                                     | 44.58                                             | 3.49                                      | -1.981E-05                                                    | 0.9094                                       | 0.04                                              |
| Shore 26-28 Scale A Sample 2, Run 2 | 14.32                                             | 40.31                                     | -2.288E-04                                                    | 0.9996                                       | 0.05                                              |
|                                     | 14.32                                             | 45.84                                     | -2.602E-04                                                    | 0.9988                                       | 0.06                                              |
|                                     | 19.55                                             | 47.47                                     | -2.694E-04                                                    | 0.9969                                       | 0.05                                              |
|                                     | 24.52                                             | 47.27                                     | -2.683E-04                                                    | 0.9971                                       | 0.05                                              |
|                                     | 29.62                                             | 44.03                                     | -2.499E-04                                                    | 0.9983                                       | 0.05                                              |
|                                     | 34.64                                             | 40.19                                     | -2.281E-04                                                    | 0.9978                                       | 0.03                                              |
|                                     | 39.52                                             | 24.00                                     | -1.362E-04                                                    | 0.9977                                       | 0.05                                              |
| Shore 35-40 Scale A Sample 1, Run 1 | 44.51                                             | 0.94                                      | -5.309E-06                                                    | 0.6425                                       | 0.05                                              |
|                                     | 14.32                                             | 41.90                                     | -2.378E-04                                                    | 0.9993                                       | 0.05                                              |
|                                     | 14.39                                             | 46.57                                     | -2.643E-04                                                    | 0.9720                                       | 0.06                                              |
|                                     | 19.69                                             | 44.23                                     | -2.510E-04                                                    | 0.9931                                       | 0.06                                              |
|                                     | 24.64                                             | 40.87                                     | -2.320E-04                                                    | 0.9985                                       | 0.05                                              |
|                                     | 29.67                                             | 41.17                                     | -2.337E-04                                                    | 0.9988                                       | 0.04                                              |
|                                     | 34.61                                             | 38.75                                     | -2.199E-04                                                    | 0.9990                                       | 0.05                                              |
| 39.66                               | 34.28                                             | -1.946E-04                                | 0.9977                                                        | 0.05                                         |                                                   |

|                                           |       |       |            |        |      |
|-------------------------------------------|-------|-------|------------|--------|------|
| Shore 35-40 Scale A<br>Sample 1,<br>Run 2 | 44.59 | 22.98 | -1.305E-04 | 0.9981 | 0.05 |
|                                           | 49.59 | 1.23  | -7.002E-06 | 0.5908 | 0.05 |
|                                           | 14.38 | 37.94 | -2.154E-04 | 0.9995 | 0.06 |
|                                           | 14.38 | 50.23 | -2.851E-04 | 0.9997 | 0.06 |
|                                           | 19.62 | 47.93 | -2.721E-04 | 0.9990 | 0.05 |
|                                           | 24.63 | 47.84 | -2.715E-04 | 0.9982 | 0.09 |
|                                           | 29.60 | 46.89 | -2.662E-04 | 0.9963 | 0.06 |
|                                           | 34.57 | 44.20 | -2.509E-04 | 0.9972 | 0.05 |
|                                           | 39.71 | 35.05 | -1.989E-04 | 0.9985 | 0.04 |
|                                           | 44.36 | 15.65 | -8.887E-05 | 0.9919 | 0.05 |
| Shore 57-63 Scale A<br>Sample 1,<br>Run 1 | 49.61 | 1.45  | -8.251E-06 | 0.4896 | 0.04 |
|                                           | 14.37 | 41.25 | -2.342E-04 | 0.9720 | 0.06 |
|                                           | 44.78 | 40.37 | -2.292E-04 | 0.9931 | 0.06 |
|                                           | 67.47 | 38.39 | -2.179E-04 | 0.9985 | 0.05 |
|                                           | 87.75 | 20.10 | -1.141E-04 | 0.9988 | 0.04 |
|                                           | 14.38 | 51.32 | -2.913E-04 | 0.9990 | 0.05 |
